# Supplementary material for: Organic dry pea (Pisum sativum L.): A sustainable alternative pulse-based protein for human health
Source: PubMed Central journal article supplement (PMC10096185; doi:10.1371/journal.pone.0284380), 2023-04-12

# PLOS ONE

## Organic dry pea (*Pisum sativum* L.): a sustainable alternative pulse-based protein for human health --Manuscript Draft--

|                                |                                                                                                                                                                                                                                                                                                                                                                                                                                                                                                                                                                                                                                                                                                                                                                                                                                                                                                                                                                                                                                                                                                                                                                                                                                                                                                                                                                                                                                                                                                                                                                                                                                                                                                                                                                                                                                                                                                                                                                                                                                                                                                                                                                                                                                                                                                                                                                                                                                                |
|--------------------------------|------------------------------------------------------------------------------------------------------------------------------------------------------------------------------------------------------------------------------------------------------------------------------------------------------------------------------------------------------------------------------------------------------------------------------------------------------------------------------------------------------------------------------------------------------------------------------------------------------------------------------------------------------------------------------------------------------------------------------------------------------------------------------------------------------------------------------------------------------------------------------------------------------------------------------------------------------------------------------------------------------------------------------------------------------------------------------------------------------------------------------------------------------------------------------------------------------------------------------------------------------------------------------------------------------------------------------------------------------------------------------------------------------------------------------------------------------------------------------------------------------------------------------------------------------------------------------------------------------------------------------------------------------------------------------------------------------------------------------------------------------------------------------------------------------------------------------------------------------------------------------------------------------------------------------------------------------------------------------------------------------------------------------------------------------------------------------------------------------------------------------------------------------------------------------------------------------------------------------------------------------------------------------------------------------------------------------------------------------------------------------------------------------------------------------------------------|
| <b>Manuscript Number:</b>      | PONE-D-22-26254                                                                                                                                                                                                                                                                                                                                                                                                                                                                                                                                                                                                                                                                                                                                                                                                                                                                                                                                                                                                                                                                                                                                                                                                                                                                                                                                                                                                                                                                                                                                                                                                                                                                                                                                                                                                                                                                                                                                                                                                                                                                                                                                                                                                                                                                                                                                                                                                                                |
| <b>Article Type:</b>           | Research Article                                                                                                                                                                                                                                                                                                                                                                                                                                                                                                                                                                                                                                                                                                                                                                                                                                                                                                                                                                                                                                                                                                                                                                                                                                                                                                                                                                                                                                                                                                                                                                                                                                                                                                                                                                                                                                                                                                                                                                                                                                                                                                                                                                                                                                                                                                                                                                                                                               |
| <b>Full Title:</b>             | Organic dry pea ( <i>Pisum sativum</i> L.): a sustainable alternative pulse-based protein for human health                                                                                                                                                                                                                                                                                                                                                                                                                                                                                                                                                                                                                                                                                                                                                                                                                                                                                                                                                                                                                                                                                                                                                                                                                                                                                                                                                                                                                                                                                                                                                                                                                                                                                                                                                                                                                                                                                                                                                                                                                                                                                                                                                                                                                                                                                                                                     |
| <b>Short Title:</b>            | Organic Dry Pea Protein Quality                                                                                                                                                                                                                                                                                                                                                                                                                                                                                                                                                                                                                                                                                                                                                                                                                                                                                                                                                                                                                                                                                                                                                                                                                                                                                                                                                                                                                                                                                                                                                                                                                                                                                                                                                                                                                                                                                                                                                                                                                                                                                                                                                                                                                                                                                                                                                                                                                |
| <b>Corresponding Author:</b>   | Dil Thavarajah<br>Clemson University<br>Clemson, SC UNITED STATES                                                                                                                                                                                                                                                                                                                                                                                                                                                                                                                                                                                                                                                                                                                                                                                                                                                                                                                                                                                                                                                                                                                                                                                                                                                                                                                                                                                                                                                                                                                                                                                                                                                                                                                                                                                                                                                                                                                                                                                                                                                                                                                                                                                                                                                                                                                                                                              |
| <b>Keywords:</b>               | Dry pea, biofortification, organic breeding, plant-based proteins, sulfur-containing amino acids, lysine                                                                                                                                                                                                                                                                                                                                                                                                                                                                                                                                                                                                                                                                                                                                                                                                                                                                                                                                                                                                                                                                                                                                                                                                                                                                                                                                                                                                                                                                                                                                                                                                                                                                                                                                                                                                                                                                                                                                                                                                                                                                                                                                                                                                                                                                                                                                       |
| <b>Abstract:</b>               | <p>Dry pea (<i>Pisum sativum</i> L.) is a cool-season food legume that is rich in protein (20-25%). With increasing health and ecosystem awareness, organic plant-based protein demand has increased; however, the protein quality of organic dry pea has not been well studied. This study determined the genetic variation of individual amino acids (AAs), total AAs (liberated), total protein, and <i>in vitro</i> protein digestibility of commercial dry pea cultivars grown in organic on-farm fields to inform the development of protein-biofortified cultivars. Twenty-five dry pea cultivars were grown in two USDA-certified organic on-farm locations in South Carolina (SC), USA, for two years. The concentrations of most individual AAs (15 of 17) and the total AA concentration significantly varied with dry pea cultivar. <i>In vitro</i> protein digestibility was not affected by cultivar. Total AA and protein for dry pea seeds ranged from 11.8 to 22.2 and 12.6 to 27.6 g/100 g, respectively, with heritability estimates of 0.19 to 0.25. <i>In vitro</i> protein digestibility and protein digestibility corrected AA score (PDCAAS) ranged from 83 to 95% and 18 to 64, respectively. Heritability estimates for individual AAs ranged from 0.08 to 0.42; principal component (PCA) analysis showed five significant AA clusters. Cultivar 'Fiddle' had significantly higher total AA (19.6 g/100 g) and digestibility (88.5%) than all other cultivars. CDC Amarillo and Jetset were significantly higher in cystine (Cys) and CDC Inca and CDC Striker were significantly higher in methionine (Met) than other cultivars; CDC Spectrum was the best option in terms of high levels of both Cys and Met. Lysine (Lys) concentration did not vary with cultivar. A 100 g serving of organic dry pea provides a significant portion of the recommended daily allowance of six essential AAs (14-189%) and daily protein (22-48%) for an average adult weighing 72 kg. Overall, this study shows organic dry pea has excellent protein quality, significant amounts of sulfur-containing AAs and Lys, and good protein digestibility, and thus has good potential for future plant-based food production. Further genetic studies are warranted with genetically diverse panels to identify candidate genes and target parents to develop nutritionally superior cultivars for organic protein production.</p> |
| <b>Order of Authors:</b>       | <p>Dil Thavarajah, PHD</p> <p>Tristan Lawrence, BS</p> <p>J Lucas Boatwright, PHD</p> <p>Nathan Windsor, Undergrad</p> <p>Nathan Johnson, PHD</p> <p>Joshua Kay, BS</p> <p>Emerson Shipe, PhD</p> <p>Shiv Kumar, PHD</p> <p>Pushparajah Thavarajah, PHD</p>                                                                                                                                                                                                                                                                                                                                                                                                                                                                                                                                                                                                                                                                                                                                                                                                                                                                                                                                                                                                                                                                                                                                                                                                                                                                                                                                                                                                                                                                                                                                                                                                                                                                                                                                                                                                                                                                                                                                                                                                                                                                                                                                                                                    |
| <b>Additional Information:</b> |                                                                                                                                                                                                                                                                                                                                                                                                                                                                                                                                                                                                                                                                                                                                                                                                                                                                                                                                                                                                                                                                                                                                                                                                                                                                                                                                                                                                                                                                                                                                                                                                                                                                                                                                                                                                                                                                                                                                                                                                                                                                                                                                                                                                                                                                                                                                                                                                                                                |

| Question                                                                                                                                                                                                                                                                                                                                                                                                                                                                                                                                                                                                                                                                                                                                                                                                                                                                                                                                                                                                                                                                                                                                                                                                                                                                                                                                                                            | Response                                                                                                                             |
|-------------------------------------------------------------------------------------------------------------------------------------------------------------------------------------------------------------------------------------------------------------------------------------------------------------------------------------------------------------------------------------------------------------------------------------------------------------------------------------------------------------------------------------------------------------------------------------------------------------------------------------------------------------------------------------------------------------------------------------------------------------------------------------------------------------------------------------------------------------------------------------------------------------------------------------------------------------------------------------------------------------------------------------------------------------------------------------------------------------------------------------------------------------------------------------------------------------------------------------------------------------------------------------------------------------------------------------------------------------------------------------|--------------------------------------------------------------------------------------------------------------------------------------|
| <p><b>Financial Disclosure</b></p> <p>Enter a financial disclosure statement that describes the sources of funding for the work included in this submission. Review the <a href="#">submission guidelines</a> for detailed requirements. View published research articles from <a href="#">PLOS ONE</a> for specific examples.</p> <p>This statement is required for submission and <b>will appear in the published article</b> if the submission is accepted. Please make sure it is accurate.</p> <p><b>Unfunded studies</b><br/>Enter: <i>The author(s) received no specific funding for this work.</i></p> <p><b>Funded studies</b><br/>Enter a statement with the following details:</p> <ul style="list-style-type: none"> <li>• Initials of the authors who received each award</li> <li>• Grant numbers awarded to each author</li> <li>• The full name of each funder</li> <li>• URL of each funder website</li> <li>• Did the sponsors or funders play any role in the study design, data collection and analysis, decision to publish, or preparation of the manuscript?</li> <li>• <b>NO</b> - Include this sentence at the end of your statement: <i>The funders had no role in study design, data collection and analysis, decision to publish, or preparation of the manuscript.</i></li> <li>• <b>YES</b> - Specify the role(s) played.</li> </ul> <p>* typeset</p> | <p>The funders had no role in study design, data collection and analysis, decision to publish, or preparation of the manuscript.</p> |
| <p><b>Competing Interests</b></p> <p>Use the instructions below to enter a competing interest statement for this submission. On behalf of all authors, disclose any <a href="#">competing interests</a> that could be perceived to bias this work—acknowledging all financial support and any other relevant financial or non-financial competing interests.</p>                                                                                                                                                                                                                                                                                                                                                                                                                                                                                                                                                                                                                                                                                                                                                                                                                                                                                                                                                                                                                    | <p>The authors have declared that no competing interests exist.</p>                                                                  |

This statement is **required** for submission and **will appear in the published article** if the submission is accepted. Please make sure it is accurate and that any funding sources listed in your Funding Information later in the submission form are also declared in your Financial Disclosure statement.

View published research articles from [PLOS ONE](#) for specific examples.

**NO authors have competing interests**

Enter: *The authors have declared that no competing interests exist.*

**Authors with competing interests**

Enter competing interest details beginning with this statement:

*I have read the journal's policy and the authors of this manuscript have the following competing interests: [insert competing interests here]*

\* typeset

**Ethics Statement**

Enter an ethics statement for this submission. This statement is required if the study involved:

- Human participants
- Human specimens or tissue
- Vertebrate animals or cephalopods
- Vertebrate embryos or tissues
- Field research

Write "N/A" if the submission does not require an ethics statement.

General guidance is provided below. Consult the [submission guidelines](#) for detailed instructions. **Make sure that all information entered here is included in the Methods section of the manuscript.**

N/A-the submission does not require an ethics statement

### Format for specific study types

#### Human Subject Research (involving human participants and/or tissue)

- Give the name of the institutional review board or ethics committee that approved the study
- Include the approval number and/or a statement indicating approval of this research
- Indicate the form of consent obtained (written/oral) or the reason that consent was not obtained (e.g. the data were analyzed anonymously)

#### Animal Research (involving vertebrate animals, embryos or tissues)

- Provide the name of the Institutional Animal Care and Use Committee (IACUC) or other relevant ethics board that reviewed the study protocol, and indicate whether they approved this research or granted a formal waiver of ethical approval
- Include an approval number if one was obtained
- If the study involved *non-human primates*, add *additional details* about animal welfare and steps taken to ameliorate suffering
- If anesthesia, euthanasia, or any kind of animal sacrifice is part of the study, include briefly which substances and/or methods were applied

#### Field Research

Include the following details if this study involves the collection of plant, animal, or other materials from a natural setting:

- Field permit number
- Name of the institution or relevant body that granted permission

#### Data Availability

Authors are required to make all data underlying the findings described fully available, without restriction, and from the time of publication. PLOS allows rare exceptions to address legal and ethical concerns. See the [PLOS Data Policy](#) and [FAQ](#) for detailed information.

Yes - all data are fully available without restriction

A Data Availability Statement describing where the data can be found is required at submission. Your answers to this question constitute the Data Availability Statement and **will be published in the article**, if accepted.

**Important:** Stating 'data available on request from the author' is not sufficient. If your data are only available upon request, select 'No' for the first question and explain your exceptional situation in the text box.

Do the authors confirm that all data underlying the findings described in their manuscript are fully available without restriction?

**Describe where the data may be found in full sentences. If you are copying our sample text, replace any instances of XXX with the appropriate details.**

- If the data are **held or will be held in a public repository**, include URLs, accession numbers or DOIs. If this information will only be available after acceptance, indicate this by ticking the box below. For example: *All XXX files are available from the XXX database (accession number(s) XXX, XXX).*
- If the data are all contained **within the manuscript and/or Supporting Information files**, enter the following: *All relevant data are within the manuscript and its Supporting Information files.*
- If neither of these applies but you are able to provide **details of access elsewhere**, with or without limitations, please do so. For example:

*Data cannot be shared publicly because of [XXX]. Data are available from the XXX Institutional Data Access / Ethics Committee (contact via XXX) for researchers who meet the criteria for access to confidential data.*

*The data underlying the results presented in the study are available*

All relevant data are within the manuscript and its Supporting Information files.

|                                                                                                                                                                                                                                                                                   |                                                                                                                                                                                  |
|-----------------------------------------------------------------------------------------------------------------------------------------------------------------------------------------------------------------------------------------------------------------------------------|----------------------------------------------------------------------------------------------------------------------------------------------------------------------------------|
| <p><i>from (include the name of the third party and contact information or URL).</i></p> <ul style="list-style-type: none"><li>• This text is appropriate if the data are owned by a third party and authors do not have permission to share the data.</li></ul> <p>* typeset</p> |                                                                                                                                                                                  |
| Additional data availability information:                                                                                                                                                                                                                                         | Tick here if the URLs/accession numbers/DOIs will be available only after acceptance of the manuscript for publication so that we can ensure their inclusion before publication. |

1 **Running Title:** Organic Dry Pea Protein Quality

2

3

4

5 **Organic dry pea (*Pisum sativum* L.): a sustainable alternative pulse-based protein for**  
6 **human health**

7

8 Dil Thavarajah<sup>\*1</sup>, Tristan Lawrence<sup>1</sup>, Lucas Boatwright<sup>1</sup>, Nathan Windsor<sup>1</sup>, Nathan Johnson<sup>1</sup>,  
9 Joshua Kay<sup>1</sup>, Emerson Shipe<sup>1</sup>, Shiv Kumar<sup>2</sup>, Pushparajah Thavarajah<sup>1</sup>

10 <sup>1</sup>Plant and Environmental Sciences, Pulse Quality and Nutritional Breeding, Biosystems Research  
11 Complex, 105 Collings St, Clemson University, Clemson, South Carolina, 29634, USA.

12 <sup>2</sup>Food Legumes Research Program, International Centre for Agricultural Research in the Dry  
13 Areas (ICARDA), Amlaha, India.

14

15 \*Corresponding author

16 Email: [dthavar@clemson.edu](mailto:dthavar@clemson.edu) (DT)

17

18

19

20

21

22

23

24

25

## 26 **Abstract**

27 Dry pea (*Pisum sativum* L.) is a cool-season food legume that is rich in protein (20-25%). With  
28 increasing health and ecosystem awareness, organic plant-based protein demand has increased;  
29 however, the protein quality of organic dry pea has not been well studied. This study determined  
30 the genetic variation of individual amino acids (AAs), total AAs (liberated), total protein, and *in*  
31 *vitro* protein digestibility of commercial dry pea cultivars grown in organic on-farm fields to  
32 inform the development of protein-biofortified cultivars. Twenty-five dry pea cultivars were  
33 grown in two USDA-certified organic on-farm locations in South Carolina (SC), USA, for two  
34 years. The concentrations of most individual AAs (15 of 17) and the total AA concentration  
35 significantly varied with dry pea cultivar. *In vitro* protein digestibility was not affected by cultivar.  
36 Total AA and protein for dry pea seeds ranged from 11.8 to 22.2 and 12.6 to 27.6 g/100 g,  
37 respectively, with heritability estimates of 0.19 to 0.25. *In vitro* protein digestibility and protein  
38 digestibility corrected AA score (PDCAAS) ranged from 83 to 95% and 18 to 64, respectively.  
39 Heritability estimates for individual AAs ranged from 0.08 to 0.42; principal component (PCA)  
40 analysis showed five significant AA clusters. Cultivar ‘Fiddle’ had significantly higher total AA  
41 (19.6 g/100 g) and digestibility (88.5%) than all other cultivars. CDC Amarillo and Jetset were  
42 significantly higher in cystine (Cys) and CDC Inca and CDC Striker were significantly higher in  
43 methionine (Met) than other cultivars; CDC Spectrum was the best option in terms of high levels  
44 of both Cys and Met. Lysine (Lys) concentration did not vary with cultivar. A 100 g serving of  
45 organic dry pea provides a significant portion of the recommended daily allowance of six essential  
46 AAs (14-189%) and daily protein (22-48%) for an average adult weighing 72 kg. Overall, this  
47 study shows organic dry pea has excellent protein quality, significant amounts of sulfur-containing  
48 AAs and Lys, and good protein digestibility, and thus has good potential for future plant-based  
49 food production. Further genetic studies are warranted with genetically diverse panels to identify  
50 candidate genes and target parents to develop nutritionally superior cultivars for organic protein  
51 production.

52

53 **Keywords:** Dry pea, biofortification, organic breeding, plant-based proteins, sulfur-containing  
54 amino acids, lysine

55

56



## 57 Introduction

58 The plant-based protein market has been steadily growing globally. American retail sales increased  
59 by 6% in 2021, bringing the plant-based protein market's total value to \$7.4B in 2021 [1]. About  
60 39% of Americans consume plant-based protein alternative foods due to various health and  
61 ecosystem concerns [2,3]. Globally, the plant-based protein market will continue to increase to a  
62 \$9.5B industry by 2025. To meet the global demand for plant-based protein, ingredient suppliers  
63 have expanded the need for novel clean, pesticide-free, and gluten-free plant proteins from organic  
64 pulse crops, including dry pea (*Pisum sativum* L.). Dry peas are the most in-demand ingredient for  
65 this segment of the food industry due to their high protein (20-25%) and low fat (<1%) levels.  
66 Certified organic dry pea production has increased in US regions that have not been historically  
67 used to grow pulse crops, including South Carolina (SC), to meet the demand for plant-based  
68 protein [4]. Current food choices including the “*Beyond Burger*” and “*Impossible Burger*” use dry  
69 pea as their primary protein ingredient rather than soy protein. However, concerns related to plant-  
70 based proteins focus on amino acid (AA) balance, i.e., legume-based protein is low in sulfur-  
71 containing AAs (SAAs: cystine, Cys and methionine, Met), and poor digestibility. The  
72 development and selection of nutritionally superior organic dry pea cultivars will bring significant  
73 economic benefits to organic growers and nutritional value to consumers.

74 Organic agriculture is the fastest-growing segment of US agriculture, with total sales of  
75 \$9.9B in 2019 [5]. Organic grains, including corn, wheat, and soybean, accounted for \$1.18B of  
76 this total, an increase of 55% from 2016 [5]. Pulse crops are an integral part of the global food  
77 system and can provide protein, low-digestible carbohydrates, and micronutrient-rich foods at a  
78 lower price than systems centered on animal proteins [4,6–8]. Certified organic dry pea production  
79 in the USA is small, with 16,666 ac in 2019 and a \$5.9M value of sales from 104 USDA-certified  
80 organic farms [5]. Legume-inclusive cropping systems bring multiple benefits to organic  
81 agriculture: (1) at the food system level, pulses provide a significant amount of protein, low-  
82 digestible carbohydrates, and a range of micronutrients with low phytate for both humans and  
83 animals; (2) at the production system level, legumes fix atmospheric N and improve soil  
84 phosphorus (P), which provides economic value to organic producers, making them more suitable  
85 for low-input cropping systems and mitigating greenhouse gas emissions as a result of no N and P  
86 fertilizer inputs; and (3) at the cropping system level, legumes can be used as diversification crops  
87 in agroecosystems (e.g., in rotation with cereals), resulting in increased cereal crop yields due to

88 disrupted pest (disease, insect, and weed) cycles, conserved soil moisture, and improved soil health  
89 via soil microbial activity [4,9–11].

90 Plant-based protein represents about 60% of the total global protein consumed, with the  
91 remainder from animal sources [12]. Developing countries mainly depend on plant-based protein,  
92 and the global population is overall shifting toward plant-based alternative proteins. However, the  
93 quantity of protein in plant-based foods is not a good indicator of their ability to meet the  
94 nutritional demands of growing populations; protein quality, i.e., AA balance, must be considered  
95 [13]. Animal and plant-based proteins have different AA profiles and digestibility. Humans cannot  
96 synthesize essential AAs; therefore, these must be obtained from dietary sources [14]. Cereals have  
97 low lysine (Lys) concentrations and moderate-to-high concentrations of the SAAs, namely  
98 methionine (Met) and cysteine (Cys); however, pulses have high Lys and low-to-moderate levels  
99 of Met and Cys. Therefore, plant-based diets require that cereals be supplemented with Lys-rich  
100 ingredients such as dry pea [8,15]. With the increasing global population, dependence on animal  
101 sources for daily human protein requirements is not a viable option (e.g., higher energy and labor  
102 requirements, antibiotic resistance, and greenhouse gas emissions). Therefore, breeding traditional  
103 pulse crops for protein biofortification is essential to provide clean, allergen- and gluten-free, and  
104 highly nutritious plant-based protein to meet the world's protein demands by 2050 [8,15,16].

105 Biofortification is an approach to increasing nutritional quality using conventional plant  
106 breeding and genomic tools to develop staple food crops with bioavailable micronutrients [17–19].  
107 Dry pea micronutrient enrichment has been successful over the years, and most breeding programs  
108 around the world use available tools to develop mineral- and vitamin-rich cultivars with low phytic  
109 acid [20–22]. These biofortified cultivars perform well under non-organic growing systems but  
110 have low yields and protein content when grown under an organic system without synthetic  
111 fertilizer and pesticides. Therefore, organic nutritional breeding of pulse crops for increased  
112 protein quality is vital to overcome the issues related to growers, the food industry, and the  
113 nutrition community to meet increasing consumer demand. This study aimed to evaluate if the  
114 current dry pea cultivars in production vary in protein quality (AA composition, total AA, total  
115 protein, and *in vitro* protein digestibility) in response to organic cropping systems. The objectives  
116 of this study were to assess 25 dry pea cultivars grown in two organic on-farm locations for two  
117 years to determine the genetic variation of AA profiles, total AA, protein, and *in vitro* digestibility  
118 to identify suitable cultivars for organic production with increased nutrition quality.

## 119 **Materials and Methods**

120 **Materials:** Reagents, solvents, and high-purity standards for AA analysis were purchased from  
121 Sigma Aldrich Co. (St. Louis, MO), Fisher Scientific (Waltham, MA), and VWR International  
122 (Radnor, PA). Ultrapure water and deionized water (ddH<sub>2</sub>O) to a resistance of  $\geq 18.2 \text{ M}\Omega \times \text{cm}$   
123 (PURELAB flex 2 system, ELGA LabWater North America, Woodridge, IL) were used.

124 **Experimental details:** The experimental field design was a randomized complete block design  
125 (RCDB) with 25 cultivars with two replications at two locations in 2019 and three replications at  
126 one location in 2020 (n=175; **Table 1**) [4]. The seeds were purchased from Pulse USA (Bismark,  
127 ND, USA), Meridian Seeds (Mapleton, ND, USA), and the Washington State Crop Improvement  
128 Association (Pullman, WA, USA). Material transfer agreements (MTAs) were signed with the  
129 seed companies before planting these cultivars in SC, USA. Detailed experimental design,  
130 agronomic details, and results (grain yield and nutritional quality) have already been published [4].

131 USDA-certified organic on-farm locations were WP Rawl and Sons (Pelion, SC, USA) and  
132 Calhoun Fields Laboratory (Clemson University, SC, USA). Before planting, fields were tilled  
133 using a disc harrow and smoothly leveled. Plot size was 1.4×6 m (8.4 m<sup>2</sup>) with seven rows spaced  
134 20 cm apart, a seeding depth of 5-7 cm, and a seeding rate of 90 seeds m<sup>-2</sup>. USDA-certified organic  
135 inoculant (Peaceful Valley Farm Supply, Inc., USA) was added at 3.1 g kg<sup>-1</sup> seeds. At  
136 physiological maturity (110-115 days after planting), the plots were harvested, and 500 g of seeds  
137 were hand cleaned, finely ground using a UDY grinder, and stored at -10 °C until protein quality  
138 analysis. All protein quality data are reported on a dry mass basis (15% moisture).

139 **Protein analysis:** Total seed N concentration was measured using N combustion at the Soil Testing  
140 Laboratory, Clemson University, SC, and then values converted to total protein content by  
141 multiplying by 6.25. Protein data are reported in our previous publication [4].

142 **Amino acid (AA) analysis:** The AA analysis is reported elsewhere [23] with modifications from  
143 the literature [24,25]. Samples (40 mg) of dry pea powder (particle size  $\leq 0.5 \text{ mm}$ ) were weighed  
144 into glass culture tubes (16×125 mm, PTFE lined cap). Performic acid was synthesized from  
145 formic acid and hydrogen peroxide (9:1 ratio). Once chilled in an ice bath, 5 mL of performic acid  
146 were added to each tube, which were then gently swirled on a vortex mixer before being capped  
147 and refrigerated for 16 h to convert Cys and Met to their derivatives, methionine sulfone and  
148 cysteic acid, which are more stable under acid hydrolysis. A 1/8 in. × tube length PTFE boiling  
149 rod was inserted into each tube before evaporating to dryness in a vacuum oil bath (3 gal. resin

150 trap, BACOENG, Suzhou, China) at ~70–80 °C and ~610 mmHg. Once cooled, tubes were  
151 removed, and 4.9 mL of 6 M HCl and 0.1 mL of the standard internal mix (25 mM norvaline, 25  
152 mM sarcosine) were added to each tube, which were then capped and gently swirled. Tubes were  
153 then placed in a gravity convection oven at 110 °C for 24 h to hydrolyze peptide bonds. Samples  
154 were cooled to room temperature, vortex mixed, and filtered through a 0.22 µm polypropylene  
155 syringe filter. As before, one mL of sample was added to a clean culture tube and evaporated to  
156 dryness. Samples were rehydrated with 1 mL of HPLC mobile phase A and pipetted into HPLC  
157 vials for analysis.

158 AA analysis was performed via high-performance reverse phase chromatography on an  
159 1100 series Agilent system (Agilent Technologies, Santa Clara, CA, USA) [26,27] with a diode  
160 array detector at two wavelengths (338 nm, 10 nm bandwidth, reference 390 nm, 20 nm bandwidth;  
161 and 262 nm, 10 nm bandwidth, reference 390 nm, 20 nm bandwidth). An aqueous and an organic  
162 solvent were used for mobile phases A and B, respectively. Mobile phase A contained 10 mM  
163 sodium phosphate, 10 mM sodium tetraborate decahydrate, and 5 mM sodium azide with a pH  
164 adjusted to 8.2 with 12 M HCl. The solution was then filtered through 0.2 µm regenerated  
165 cellulose. Mobile phase B consisted of 45% methanol, 45% acetonitrile, and 10% water (v/v/v). A  
166 lab reference dry pea sample was included in every digestion batch to monitor batch-to-batch  
167 variation, and an AA standard mix was run on the high-performance liquid chromatograph (HPLC)  
168 before analyzing each batch of samples. Calibration standards (9–900 pmol/µL) with internal  
169 standards norvaline and sarcosine (500 pmol/µL) were run, and linear calibration models were  
170 generated based on peak areas for calculating sample AA concentrations, which were converted  
171 into percent of dry pea flour. The total AA concentration was calculated by summing all AA  
172 concentrations for each sample.

173 ***In vitro protein digestibility analysis:*** Protein digestibility was measured using the Megazyme  
174 Protein Digestibility Amino Acid Score assay kit with the modified protocol for a 100 mg sample  
175 size (Megazyme 2019). Ground samples (100 mg) were weighed into 50 mL plastic falcon tubes,  
176 to which 3.8 mL of 0.06 N hydrochloric acid were added and the mixture vortexed. The tubes were  
177 then placed into a tabletop heated air shaker at 37 °C for 30 min at 300 rpm. After shaking, 0.2 mL  
178 of pepsin solution were added to the tube and the mixture vortexed. The tubes were then placed  
179 back into the shaker at 37 °C for 60 min at 300 rpm and, after the pepsin incubation, 0.4 mL of  
180 TRIS buffer were added. The tubes were then vortexed, and 40 µL of trypsin/chymotrypsin

181 solution were added with the tubes then placed back in the air shaker for 4 h. After the  
182 trypsin/chymotrypsin incubation, the tubes were placed in a 100 °C water bath for 10 min and then  
183 vortexed and brought to room temperature on the counter for a minimum of 20 min. After the  
184 overnight cold incubation, the tubes were centrifuged for 10 min. Ninety-six well plates were  
185 utilized for the colorimetric analysis. The Megazyme Excel calculator was modified to change the  
186 approximate sample mass from 0.5 to 0.1 g. In addition to the controls in the assay kit, a lab  
187 reference lentil sample was included in every batch to monitor batch-to-batch variation. The  
188 protein digestibility corrected amino acid score (PDCAAS) was calculated based on the Megazyme  
189 Excel calculator, determined by comparing the AA profile of the dry pea against a standard AA  
190 profile, with 100 as the highest possible score.

191 **Statistical analysis:** Replicates, years, and cultivars were used as class variables. Data from both  
192 years were combined (after testing for heterogeneity) and analyzed using a general linear model  
193 procedure (PROC GLM) mixed model. Fisher's least significant difference (LSD) at  $\leq 0.05$  was  
194 performed for mean separation. Correlations (Pearson correlation coefficients) among traits were  
195 determined. A statistical model was developed to estimate broad-sense heritability ( $H^2$ ) with the  
196 class variables and genotype as random effects. The model was fit using restricted maximum  
197 likelihood (REML).  $H^2$  was estimated as the proportion of variance due to cultivar, and analyses  
198 were performed using JMP 14.0.0 and SAS 9.4 [28]. Percent recommended dietary allowance  
199 estimates were calculated for the essential AAs [Cys, histidine (His), isoleucine (Iso), leucine  
200 (Leu), Lys, Met, phenylalanine (Phe), threonine (Thr), valine (Val)] and total AA concentration.  
201 Estimates were based on a 72 kg adult consuming 100 g of dry pea (15% moisture content) per  
202 day: 8–12 mg/kg His, 10 mg/kg Iso, 14 mg/kg Leu, 12 mg/kg Lys, 13 mg/kg Met + Cys, 14 mg/kg  
203 Phe + Tyr, 10 mg/kg Val, and 0.8 g/kg protein [29].

## 204 **Results**

205 **Analysis of variance:** Cultivars showed significant variation at  $P < 0.05$  and  $P < 0.1$  for most traits  
206 except for His, hydroxyproline (Hpr), Lys, and *in vitro* protein digestibility (**Table 2**). Location  
207 was significant for most cases except for serine (Ser) and total AAs. Similarly, the year effect was  
208 significant at  $P < 0.05$  and  $P < 0.1$  for 12 of 17 AAs, total AAs, total protein, and *in vitro*  
209 digestibility. Significant interactions of either cultivar  $\times$  location or cultivar  $\times$  year varied with the  
210 traits. The *in vitro* protein digestibility showed a significant effect only with the location and year;  
211 no effect was evident with cultivar  $\times$  location or cultivar  $\times$  year (**Table 2**). Broad-sense heritability

212 estimates were very low to moderate (0.06-0.42), with the highest for arginine (Arg; 0.42) and  
213 total protein (0.25). Broad-sense heritability estimates were very low for SAAs (Met and Cys) and  
214 Lys (**Table 2**).

215 **Protein quality:** Organic dry pea cultivars had values of 11.8 to 22.2 g/100 g for total AAs  
216 (liberated), 12.6 to 27.6 g/100 g for total protein, 18 to 64 for PDCAAS value, and 83 to 95% for  
217 *in vitro* protein digestibility (**Table 3**). Dry pea contained a range of individual AAs, including  
218 nine essential AAs with a mean of 0.22 g/100 g for SAAs and 0.88 g/100 g for Lys (**Table 3**).  
219 These organic dry pea cultivars provide a significant amount of the recommended daily allowance  
220 (%RDA) of several AAs (14-66% His, 79-138% Iso, 76-169% Leu, 57-147% Lys, 15-85% Met +  
221 Cys, 76-189% Phe + Tyr, 94-169% Val) as well as protein (22-48%) (**Table 3**). Pearson's  
222 correlation analysis revealed that most correlations were significantly positive except for Hpr vs.  
223 His and *in vitro* protein digestibility vs. Lys (**Table 4**). Total protein showed a significant positive  
224 correlation with all AAs except Hpr; Lys and Cys were also not correlated; and Hpr showed non-  
225 significant correlations in several cases (**Table 4**). The first two principal components (PCA) of  
226 the principal component analysis (PCA) accounted for 12.46, and 1.83 for the eigenvalues. Cluster  
227 summary showed components of the total variance: (1) component 1 (62.3%): total AAs and 13  
228 of 17 AAs; (2) component 2 (9.17%): Hpr and His; (3) component 3 (8.07%): *in vitro* protein  
229 digestibility; (4) component 4 (5.34%); protein and Arg; and (5) component 5 (2.93%): Cys (**Fig.**  
230 **1**). Most of the variation was captured by the first component (62.3%), which is highly correlated  
231 with the values of most AAs excluding Hpr and His.

232 **Cultivar responses:** Dry pea cultivars showed a normal distribution pattern for Cys, Met, total  
233 AAs, and *in vitro* protein digestibility (**Fig. 2**). Out of 175 observations, 6.4% were high in Cys  
234 and Met, 8.8% were high in total AAs, and 5.6% were high for *in vitro* protein digestibility (**Fig.**  
235 **2**). Among the 25 cultivars tested, 10 cultivars showed more than 18 g/100 g of total AAs, with  
236 Fiddle being the highest and AAC Carver and AC Earllystar the lowest (**Fig. 3**). For *in vitro* protein  
237 digestibility, 17 of 25 cultivars showed a digestibility of 87% or better, with Fiddle having the  
238 highest value and AAC Carver the lowest (**Fig. 3**). CDC Saffron, CDC Spectrum, and CDC Striker  
239 showed significantly higher concentrations of SAAs than AAC Carver and AC Earllystar (**Fig. 4**).  
240 AAC Comfort showed higher Lys concentrations than other cultivars, but the effects were not  
241 significant (**Fig. 4**).

242

## 243 Discussion

244 Our results demonstrate that current dry pea cultivars bred for conventional systems vary in terms  
245 of seed AA profile, total AAs, total protein, and *in vitro* protein digestibility when grown under  
246 organic cropping systems. Organic dry pea is a rich source of essential AAs, as a 100 g serving of  
247 organic dry pea provides 0.02-3.07 g/100 g of nine essential AAs (14-180% of RDA), 11.8-22.2 g  
248 of total AAs, and 22-48% of the daily protein requirement, with an *in vitro* protein digestibility of  
249 83-95% (Table 3). In contrast to previous literature that states pulses are generally low in SAAs,  
250 our results demonstrate organic dry pea is a good source of SAAs (Met and Cys), with a 100 g  
251 serving providing 220 mg of total SAAs (Met+Cys) and 1.33 g of Lys (Table 3; Fig. 4) [31].  
252 According to our knowledge, this study is the first report on the detailed protein quality of  
253 commercial dry pea cultivars grown in an organic system towards protein biofortification.

254 The organic dry pea cultivars in this study had mean protein and total AA (liberated)  
255 concentrations of 20.9 g/100 g and 17.5 g/100 g, respectively (Table 3). Several dry pea cultivars  
256 had high total AAs (>18 g/100 g) and >87% *in vitro* protein digestibility (Fig. 3), demonstrating  
257 they are suitable for organic plant-based protein production. Among the cultivars tested, Fiddle  
258 had the highest total AA concentrations (19.6 g/100 g), and AAC Carver (15.5 g/100 g) and AC  
259 Earlystar (16.1 g/100 g) the lowest. Our previous study on the agronomic adaptability of dry pea  
260 [4] indicated AAC Carver, Jetset, and Mystique as the highest yielding cultivars (>2000 kg/ha)  
261 and most suitable for organic production without a yield penalty compared to conventional  
262 growing systems. However, the current study indicates these three cultivars have low total AAs  
263 and *in vitro* protein digestibility (Fig. 3). A negative correlation between protein quality and crop  
264 adaptability suggests further testing is needed with diverse dry pea germplasm to develop  
265 biofortified organic cultivars with better grain yield, agronomic adaptability, and protein quality  
266 for organic systems [4,8,32]. Earlier literature [30,33] indicates the AA composition of dry pea  
267 varies with cultivar and growing environment, similar to the current study's results. Further, one  
268 of these earlier studies shows dry pea has high concentrations of Arg, Leu, Lys, aspartic acid, and  
269 glutamic acid and low concentrations of His, Met, Thr, and Cys [33]. Another study compared  
270 several plant-based protein isolates for essential and non-essential AAs and found dry pea protein  
271 isolates contained only 5.9% Lys and low concentrations of Met [34]. In contrast, our study results  
272 show most modern cultivars have higher Cys, Met, and total AA concentrations and good *in vitro*  
273 protein digestibility (Fig. 3). The best options to use for better protein quality are CDC Spectrum

274 for Met and Cys, CDC Inca and CDC Striker for Met, and CDC Amarillo and Jetset for Cys (**Fig.**  
275 **4**). These cultivars have AA values within the range of the AAs reported in the literature for  
276 conventional cropping systems [31,34]. Incorporating these cultivars into dry pea breeding  
277 programs would benefit the development of better protein quality cultivars; however, more field  
278 testing is required to understand the genetic, environmental, and management interactions. Organic  
279 agriculture management varies with respect to on-farm practices for weeds, diseases, pests, and  
280 fertilizer; therefore, breeding dry pea cultivars best suited for organic management with increased  
281 nutritional quality is challenging [35].

282 AAs are critical for all forms of life. Humans cannot synthesize all 20 AAs needed for  
283 protein synthesis for good health. Nine essential AAs must be obtained from the diet: Lys, Met,  
284 and Thr of the aspartate (Asp) family pathway; phenylalanine (Phe) and tryptophan (Trp) of the  
285 aromatic AAs; Val, Ile, and Leu of the branched-chain AAs (BCAAs); and His [36]. Lys, Met, Thr,  
286 and Trp levels limit the nutritional quality of plant-based foods because levels of these four AAs  
287 in plants are very low compared with those required for optimal human nutrition [8,36]. PCA  
288 analysis in the current study revealed seven essential AAs (Val, Iso, Thr, Leu, Met, Lys, and Phe)  
289 of organic dry pea in component 1, and one essential AA (His) in component 2 (**Fig. 1**). These  
290 essential AAs are also positively correlated with total AA, protein, and *in vitro* digestibility (**Table**  
291 **4**), indicating biosynthesis of these AAs could be upregulated using available genomic and  
292 biotechnology tools for early prediction of protein quality traits in breeding programs [8,36,37].  
293 Plant-soluble Met and Lys levels might represent limiting factors for synthesizing Met- or Lys-  
294 rich proteins [37]. Expressing genes that increase Lys and Met biosynthesis in combination with  
295 genes encoding proteins rich in Lys and Met codons appears to increase the levels of Lys in  
296 transgenic corn [37]. However, these transgenic approaches are not approved in USDA-certified  
297 organic agriculture systems. Conventional breeding approaches for selecting genetic material with  
298 higher levels of AAs and protein quality using association mapping and genomic prediction tools  
299 are the only recommended methods for organic pulse breeding.

300 Dietary protein quality has two components: AA composition and availability. Availability  
301 is “the proportion of the dietary amino acids that are digested and absorbed in a form suitable for  
302 body protein synthesis” [38]. PDCAAS is the most common method used to determine protein  
303 availability [39]. We determined *in vitro* protein digestibility using an enzyme assay and then  
304 calculated PDCAAS based on the AA scores. This method is inexpensive and high-throughput and



305 can be used to screen a larger number of seed samples for breeding programs than available *in vivo*  
306 methods [40]. The PDCAAS values for organic dry pea cultivars tested in this study ranged from  
307 18 to 64 with 83-95% *in vitro* protein digestibility. Most organic dry pea cultivars have high protein  
308 digestibility (>87%), and these values are similar to those from the literature [41]. Plant-based  
309 proteins are an inexpensive, healthy choice for many people and a vital source of daily essential  
310 AAs. These proteins have several limitations in terms of human nutrition: they often lack one or  
311 more essential AAs, they are often not fully digestible, and toxins and pesticides are concentrated  
312 during protein extraction and drying procedures. Therefore, pursuing nutritional breeding or  
313 biofortification of dry pea using an organic system approach is vital to overcome these nutritional  
314 and production issues for pulse growers and consumers. Organic nutritional breeding of pulses is  
315 challenging and demands better phenotyping and genetic resources for cultivar development. With  
316 the increasing availability of genomic resources, expanding organic pulse breeding targets to  
317 produce better quality proteins with higher digestibility will be possible in the future.

## 318 **Acknowledgments**

319 We thank the Crop Improvement Team (Clemson University), David Robb (Organic Farm,  
320 Clemson University), and Charles Wingard and Ashely Rawls from WP Rawl & Sons, Inc. for  
321 field operations; Martin Hochhalter (Meridian Seeds), Tyler Kres (Pulse USA), and the  
322 Washington State Crop Improvement Association for providing dry pea seeds; and Elizabeth Bean,  
323 Jacob Johnson, Lindsey Moroney and Richard Baker for the technical assistant for the pulse  
324 breeding program.

## 325 **Funding**

326 Funding support for this project was provided by the Organic Agriculture Research and Extension  
327 Initiative (OREI) (award no. 2018-51300-28431/proposal no. 2018-02799) and the United States  
328 Department of Agriculture, National Institute of Food and Agriculture (award no. 2021-51300-  
329 34805/proposal no. 2021-02927) (DT, LB); the USDA National Institute of Food and Agriculture,  
330 [Hatch] project [1022664] (DT); the Good Food Institute (DT); and FoodShot Global (DT).

331 **Funding Statement:** "The funders had no role in study design, data collection, and  
332 analysis, decision to publish, or preparation of the manuscript. Its contents are solely the  
333 responsibility of the authors and do not necessarily represent the official views of the USDA."  
334 Authors have no conflict of Interest.

## 335 **References**

- 336 1. The Good Food Institute. 2021 State of the industry report. 2021.
- 337 2. Kerry. Winning with Plant-Based. Unlocking the Keys to Success for a Growing Market,  
338 Proprietary consumer research. 2020. [https://www.fooddive.com/press-release/20200309-](https://www.fooddive.com/press-release/20200309-kerry-releases-report-on-plant-based-food-beverage-1/)  
339 [kerry-releases-report-on-plant-based-food-beverage-1/](https://www.fooddive.com/press-release/20200309-kerry-releases-report-on-plant-based-food-beverage-1/)
- 340 3. Milo Ohr L. Plant-based protein market grows stronger. Food Technology Magazine.  
341 2020; 74(10). [https://www.ift.org/news-and-publications/food-technology-](https://www.ift.org/news-and-publications/food-technology-magazine/issues/2020/october/columns/nutraceuticals-plant-based-protein-market-grows-stronger)  
342 [magazine/issues/2020/october/columns/nutraceuticals-plant-based-protein-market-grows-](https://www.ift.org/news-and-publications/food-technology-magazine/issues/2020/october/columns/nutraceuticals-plant-based-protein-market-grows-stronger)  
343 [stronger](https://www.ift.org/news-and-publications/food-technology-magazine/issues/2020/october/columns/nutraceuticals-plant-based-protein-market-grows-stronger)
- 344 4. Thavarajah D, Lawrence TJ, Powers SE, Kay J, Thavarajah P, Shipe E, et al. Organic dry  
345 pea (*Pisum sativum* L.) biofortification for better human health. *PLoS One*. 2022; 17:  
346 [e0261109](https://doi.org/10.1371/journal.pone.0261109). <https://doi.org/10.1371/journal.pone.0261109> 
- 347 5. USDA -NASS. National Agriculture Statistical Services. In: 2020 [Internet]. 2017.  
348 <https://quickstats.nass.usda.gov/results/FA8BCA73-7E79-3DA8-96A8-68D53707599D>
- 349 6. Thavarajah D, Thavarajah P, Wejesuriya A, Rutzke M, Glahn RP, Combs Jr. GF, et al.  
350 The potential of lentil (*Lens culinaris* L.) as a whole food for increased selenium, iron, and  
351 zinc intake: Preliminary results from a 3 year study. *Euphytica*. 2011; 180.  
352 doi:10.1007/s10681-011-0365-6
- 353 7. Johnson N, Johnson CR, Thavarajah P, Kumar S, Thavarajah D. The roles and potential of  
354 lentil prebiotic carbohydrates in human and plant health. *Plants, People, Planet*. 2020; n/a.  
355 doi:10.1002/ppp3.10103
- 356 8. Salaria S, Boatwright JL, Thavarajah P, Kumar S, Thavarajah D. Protein biofortification  
357 in lentils (*Lens culinaris* Medik.) toward human health. *Front Plant Sci*. 2022; 13.  
358 doi:10.3389/fpls.2022.869713
- 359 9. Stagnari F, Maggio A, Galieni A, Pisante M. Multiple benefits of legumes for agriculture  
360 sustainability: an overview. *Chemical and Biological Technologies in Agriculture*. 2017;  
361 4(2). doi:10.1186/s40538-016-0085-1
- 362 10. Powers SE, Thavarajah D. Checking agriculture's pulse: Field pea (*Pisum Sativum* L.),  
363 sustainability, and phosphorus use efficiency. *Front Plant Sci*. 2019; 10.  
364 doi:10.3389/fpls.2019.01489
- 365 11. Powers S, Mirsky E, Bandaranayake A, Thavarajah P, Shipe E, Bridges W, et al. Field pea

- (*Pisum sativum* L.) shows genetic variation in phosphorus use efficiency in different P environments. *Sci Rep.* 2020; 10. doi:10.1038/s41598-020-75804-0
12. Nijdam D, Rood T, Westhoek H. The price of protein: Review of land use and carbon footprints from life cycle assessments of animal food products and their substitutes. *Food Policy.* 2012; 37, 760–770. <https://doi.org/10.1016/j.foodpol.2012.08.002>
13. Ritchie H, Reay DS, Higgins P. Beyond calories: A holistic assessment of the global food system. *Frontiers in Sustainable Food Systems.* 2018; 2, 57. <https://www.frontiersin.org/article/10.3389/fsufs.2018.00057>
14. Lizarazo CI, Lampi A-M, Liu J, Sontag-Strohm T, Piironen V, Stoddard FL. Nutritive quality and protein production from grain legumes in a boreal climate. *J Sci Food Agric.* 2015; 95, 2053–2064. <https://doi.org/10.1002/jsfa.6920>
15. Leinonen I, Iannetta PPM, Rees RM, Russell W, Watson C, Barnes AP. Lysine supply is a critical factor in achieving sustainable global protein economy. *Frontiers in Sustainable Food Systems.* 2019; 3, 27. <https://www.frontiersin.org/article/10.3389/fsufs.2019.00027>
16. Khazaei H, Subedi M, Nickerson M, Martínez-Villaluenga C, Frias J, Vandenberg A. Seed protein of lentils: Current status, progress, and food applications. *Foods.* 2019; 8. doi:10.3390/foods8090391
17. Bouis HE, Welch RM. Biofortification—A sustainable agricultural strategy for reducing micronutrient malnutrition in the global south. *Crop Sci.* 2010; 50, S-20-S-32. doi:10.2135/cropsci2009.09.0531
18. Dil T, Johnson CR, McGee R, Thavarajah P. Phenotyping nutritional and antinutritional traits. In: Kumar J, Pritap S, Kumar S (Eds.), *Phenomics in Crop Plants: Trends, Options and Limitations.* 2015. doi:10.1007/978-81-322-2226-2\_15
19. Jha AB, Warkentin TD. Biofortification of pulse crops: Status and future perspectives. *Plants.* 2020;9. doi:10.3390/plants9010073
20. Thavarajah D, Warkentin T, Vandenberg A. Natural enrichment of selenium in Saskatchewan field peas (*Pisum sativum* L.). *Can J Plant Sci.* 2010; 90(4). doi:10.4141/CJPS09154
21. Ray H, Bett K, Tar'an B, Vandenberg A, Thavarajah D, Warkentin T. Mineral micronutrient content of cultivars of field pea, chickpea, common bean, and lentil grown in Saskatchewan, Canada. *Crop Sci.* 2014; 54. doi:10.2135/cropsci2013.08.0568

- 397 22. Shunmugam AS, Liu X, Stonehouse R, Tar'An B, Bett KE, Sharpe AG, et al. Mapping  
398 seed phytic acid concentration and iron bioavailability in a pea recombinant inbred line  
399 population. *Crop Sci.* 2015; 55, 828–836. doi:10.2135/cropsci2014.08.0544
- 400 23. Madurapperumage A, Johnson N, Thavarajah P, Tang L, Thavarajah D. Fourier-transform  
401 infrared spectroscopy (FTIR) as a high-throughput phenotyping tool for quantifying  
402 protein quality in pulse crops. *Plant Phenome J.* 2022; 5, e20047.  
403 doi:<https://doi.org/10.1002/ppj2.20047>
- 404 24. Gehrke CW, Wall Sr LL, Absheer JS, Kaiser FE, Zumwalt RW. Sample preparation for  
405 chromatography of amino acids: Acid hydrolysis of proteins. *J Assoc Off Anal Chem.*  
406 1985; 68, 811–821. doi:10.1093/jaoac/68.5.811
- 407 25. Manneberg M, Lahm HW, Fountoulakis M. Quantification of cysteine residues following  
408 oxidation to cysteic acid in the presence of sodium azide. *Anal Biochem.* 1995; 231, 349–  
409 353. doi:10.1006/abio.1995.9988
- 410 26. Agilent Application Note. Separation of two sulfurated amino acids with other seventeen  
411 amino acids by HPLC with pre-column derivatization. Agilent Technol. 2010.
- 412 27. Long W. Automated Amino Acid Analysis Using an Agilent Poroshell HPH-C18 Column.  
413 Agilent Technol. 2015.
- 414 28. SAS Institute Inc. SAS Institute Inc. Cary; NC; 2013: User's guide: Statistics SAS  
415 Institute; 2013.
- 416 29. National Research Council (US) Subcommittee on the Tenth Edition of the Recommended  
417 Dietary Allowances. In: Recommended Dietary Allowances: 10<sup>th</sup> Edition. Washington  
418 (DC): National Academies Press (US) [Internet]. 1989 [cited 26 Aug 2022] p. 6.  
419 <https://www.ncbi.nlm.nih.gov/books/NBK234922/>
- 420 30. Khan MA, Jacobsen I, Eggum BO. Nutritive value of some improved varieties of  
421 legumes. *J Sci Food Agric.* 1979; 30, 395–400. <https://doi.org/10.1002/jsfa.2740300409>
- 422 31. Bonke A, Sieuwerts S, Petersen IL. Amino acid composition of novel plant drinks from  
423 oat, lentil and pea. *Foods.* 2020; 9, 429. doi:10.3390/foods9040429
- 424 32. Daba SD, Morris CF. Pea proteins: Variation, composition, genetics, and functional  
425 properties. *Cereal Chem.* 2022; 99, 8–20. <https://doi.org/10.1002/cche.10439>
- 426 33. Holt NW, Sosulski FW. Amino acid composition and protein quality of field peas. *Can J*  
427 *Plant Sci.* 1979; 59, 653–660. doi:10.4141/cjps79-103

- 428 34. Gorissen SHM, Crombag JJR, Senden JMG, Waterval WAH, Bierau J, Verdijk LB, et al.  
429 Protein content and amino acid composition of commercially available plant-based protein  
430 isolates. *Amino Acids*. 2018; 50, 1685–1695. doi:10.1007/s00726-018-2640-5
- 431 35. Boyhan GE, Stone SP. Breeding for organic and sustainable production. In: Nandwani D  
432 (Ed.), *Organic Farming for Sustainable Agriculture*. Cham: Springer International  
433 Publishing; 2016. pp. 123–136. doi:10.1007/978-3-319-26803-3\_6
- 434 36. Galili G, Amir R, Fernie AR. The regulation of essential amino acid synthesis and  
435 accumulation in plants. *Annu Rev Plant Biol*. 2016; 67, 153–178. doi:10.1146/annurev-  
436 arplant-043015-112213
- 437 37. Galili G, Amir R. Fortifying plants with the essential amino acids lysine and methionine to  
438 improve nutritional quality. *Plant Biotechnol J*. 2013; 11, 211–222.  
439 <https://doi.org/10.1111/pbi.12025>
- 440 38. Rutherford SM, Moughan PJ. Available versus digestible dietary amino acids. *Br J Nutr*.  
441 2012; 108, S298–S305. doi:10.1017/S0007114512002528
- 442 39. FAO/WHO. Dietary protein quality evaluation in human nutrition. Report of an FAO  
443 expert consultation. *Food and Nutrition Paper No 9*. 2013.
- 444 40. Cordero-Clavijo LM, Serna-Saldívar SO, Lazo-Vélez MA, González JFA-, Panata-  
445 Saquicilí D, Briones-García M. Characterization, functional and biological value of  
446 protein-enriched defatted meals from sacha inchi (*Plukenetia volubilis*) and chocho  
447 (*Lupinus mutabilis*). *J Food Meas Charact*. 2021; 15: 5071–5077. doi:10.1007/s11694-  
448 021-01084-5
- 449 41. Nosworthy MG, Franczyk AJ, Medina G, Neufeld J, Appah P, Utioh A, et al. Effect of  
450 processing on the in vitro and in vivo protein quality of yellow and green split peas (*Pisum*  
451 *sativum*). *J Agric Food Chem*. 2017; 65: 7790–7796. doi:10.1021/acs.jafc.7b03597  
452

453 **Table 1:** Experimental design used in the study.

|                   |                                                                                                                                                                                                                                                                            |
|-------------------|----------------------------------------------------------------------------------------------------------------------------------------------------------------------------------------------------------------------------------------------------------------------------|
| Year (location)   | 2019 (Clemson; Pelion), 2020 (Pelion)                                                                                                                                                                                                                                      |
| Location          | Clemson, SC; Pelion SC                                                                                                                                                                                                                                                     |
| Replicates (Year) | 2 (2019); 3 (2020)                                                                                                                                                                                                                                                         |
| Cultivars (25)    | AAC Carver, AAC Comfort, AC Agassiz, AC Earlystar, Banjo, CDC Amarillo, CDC Greenwater, CDC Inca, CDC Saffron, CDC Spectrum, CDC Striker, Delta, DS Admiral, Durwood, Fiddle, Flute, Hampton, Jetset, Korando, LG Koda, Matrix, Mystique, Nette 2010, SW Arcadia, SW Midas |
| Total             | 175                                                                                                                                                                                                                                                                        |

454

455

456

457

458

459

460

461

462

463

464

465

466

467

468 **Table 2:** Analysis of variance and broad-sense heritability estimates of protein quality traits evaluated for dry pea tested in SC, USA.

| Component              | Cultivar | Location | Year | Cultivar × Location | Cultivar × Year | $H^2$ |
|------------------------|----------|----------|------|---------------------|-----------------|-------|
| Alanine                | **       | **       | *    | **                  | **              | 0.11  |
| Arginine               | **       | **       | **   | NS                  | *               | 0.42  |
| Asparagine             | **       | **       | **   | **                  | **              | 0.08  |
| Cystine                | *        | **       | NS   | **                  | **              | -     |
| Glutamine              | **       | **       | NS   | **                  | **              | 0.24  |
| Glycine                | **       | *        | **   | **                  | **              | 0.19  |
| Histidine              | NS       | **       | NS   | NS                  | NS              | 0.14  |
| Hydroxyproline         | NS       | **       | **   | NS                  | NS              | -     |
| Isoleucine             | **       | **       | **   | **                  | **              | 0.23  |
| Leucine                | **       | **       | **   | **                  | **              | 0.18  |
| Lysine                 | NS       | *        | **   | NS                  | NS              | 0.17  |
| Methionine             | **       | *        | NS   | NS                  | NS              | 0.12  |
| Phenylalanine          | *        | **       | NS   | **                  | *               | 0.23  |
| Proline                | **       | **       | **   | *                   | **              | 0.18  |
| Serine                 | **       | NS       | **   | **                  | **              | 0.13  |
| Threonine              | **       | *        | **   | **                  | **              | 0.06  |
| Valine                 | **       | **       | **   | **                  | **              | 0.13  |
| Total AA               | **       | NS       | **   | **                  | **              | 0.19  |
| Total Protein          | **       | **       | **   | NS                  | *               | 0.25  |
| In-vitro Digestibility | NS       | **       | **   | NS                  | NS              | 0.09  |

469 \*\* significant at  $P < 0.05$ ; \* significant at  $P < 0.1$ ; Not significant (NS);  $H^2$  broad-sense heritability estimate.

470

471

472

473

474

475

476 **Table 3:** Range and mean amino acid concentrations of organic dry pea grown in SC.

| Composition (g/100 g)             | Range      | Mean | Genotype Effect | %RDA   |
|-----------------------------------|------------|------|-----------------|--------|
| Alanine                           | 0.61-1.01  | 0.86 | **              |        |
| Arginine                          | 0.95-2.22  | 1.5  | **              |        |
| Asparagine                        | 1.59-3.07  | 2.36 | **              |        |
| Cystine                           | 0.02-0.10  | 0.05 | *               | 15-85  |
| Glutamine                         | 1.82 -3.56 | 2.86 | **              |        |
| Glycine                           | 0.60-1.08  | 0.88 | **              |        |
| Histidine                         | 0.08-0.38  | 0.26 | NS              | 14-66  |
| Hydroxyproline                    | 0.48-2.00  | 1.16 | NS              |        |
| Isoleucine                        | 0.57-0.99  | 0.8  | **              | 79-138 |
| Leucine                           | 0.77-1.70  | 1.33 | **              | 76-169 |
| Lysine                            | 0.49-1.27  | 0.88 | NS              | 57-147 |
| Methionine                        | 0.12-0.26  | 0.17 | **              |        |
| Phenylalanine                     | 0.38-1.16  | 0.89 | *               | 76-189 |
| Proline                           | 0.42-1.32  | 1.04 | **              |        |
| Serine                            | 0.58-1.09  | 0.89 | **              |        |
| Threonine                         | 0.39-0.74  | 0.59 | **              |        |
| Valine                            | 0.68-1.22  | 0.97 | **              |        |
| Total AA (liberated)              | 11.8-22.2  | 17.5 | **              |        |
| Total Protein <sup>±</sup>        | 12.6-27.6  | 20.9 | **              | 22-48  |
| PDCAAS value                      | 18-64      | 54   | ND              |        |
| <i>In vitro</i> digestibility (%) | 83-95      | 87   | NS              |        |

477 \*\* significant at  $P < 0.05$ ; \* significant at  $P < 0.1$ ; Not significant (NS); ND: Not detected; PDCAAS: Protein digestibility corrected amino  
478 acid score. <sup>±</sup> Protein values are from [4]. Values are based on the combined statistical analysis of 175 data points for the current study  
479 (dry weight basis). Percent recommended dietary allowance estimates were calculated for the essential amino acids cystine (Cys),  
480 histidine (His), isoleucine (Iso), leucine (Leu), lysine (Lys), methionine (Met), phenylalanine (Phe), threonine (Tyr), and valine (Val),  
481 as well as for total AA concentration. Estimates were for a 72 kg adult consuming 100 g of dry pea (15% moisture content) per day  
482 given the following dietary requirements: 8–12 mg/kg His, 10 mg/kg Iso, 14 mg/kg Leu, 12 mg/kg Lys, 13 mg/kg Met + Cys, 14 mg/kg  
483 Phe + Tyr, 10 mg/kg Val, and 0.8 g/kg protein [29].

484  
485



486 **Table 4:** Pearson's correlation analysis of nutritional traits among dry pea cultivars grown in the organic system.

|                            | Cys | Asp | Glu | Ser | His | Gly | Thr | Met | Arg | Ala | Val | Phe | Iso | Leu | Lys | Hpr | Pro | AA | Pr | Dig |   |
|----------------------------|-----|-----|-----|-----|-----|-----|-----|-----|-----|-----|-----|-----|-----|-----|-----|-----|-----|----|----|-----|---|
| Cys                        | -   |     |     |     |     |     |     |     |     |     |     |     |     |     |     |     |     |    |    |     |   |
| Asp                        | **  | -   |     |     |     |     |     |     |     |     |     |     |     |     |     |     |     |    |    |     |   |
| Glu                        | **  | **  | -   |     |     |     |     |     |     |     |     |     |     |     |     |     |     |    |    |     |   |
| Ser                        | **  | **  | **  | -   |     |     |     |     |     |     |     |     |     |     |     |     |     |    |    |     |   |
| His                        | **  | **  | **  | **  | -   |     |     |     |     |     |     |     |     |     |     |     |     |    |    |     |   |
| Gly                        | **  | **  | **  | **  | **  | -   |     |     |     |     |     |     |     |     |     |     |     |    |    |     |   |
| Thr                        | **  | **  | **  | **  | **  | **  | -   |     |     |     |     |     |     |     |     |     |     |    |    |     |   |
| Met                        | **  | **  | **  | **  | **  | **  | **  | -   |     |     |     |     |     |     |     |     |     |    |    |     |   |
| Arg                        | **  | **  | **  | **  | **  | **  | **  | **  | -   |     |     |     |     |     |     |     |     |    |    |     |   |
| Ala                        | **  | **  | **  | **  | **  | **  | **  | **  | **  | -   |     |     |     |     |     |     |     |    |    |     |   |
| Val                        | **  | **  | **  | **  | **  | **  | **  | **  | **  | **  | -   |     |     |     |     |     |     |    |    |     |   |
| Phe                        | **  | **  | **  | **  | **  | **  | **  | **  | **  | **  | **  | -   |     |     |     |     |     |    |    |     |   |
| Iso                        | **  | **  | **  | **  | **  | **  | **  | **  | **  | **  | **  | **  | -   |     |     |     |     |    |    |     |   |
| Leu                        | **  | **  | **  | **  | **  | **  | **  | **  | **  | **  | **  | **  | **  | -   |     |     |     |    |    |     |   |
| Lys                        | NS  | **  | **  | **  | **  | **  | **  | **  | **  | **  | **  | **  | **  | **  | -   |     |     |    |    |     |   |
| Hpr                        | NS  | **  | *   | **  | **  | **  | **  | **  | NS  | NS  | **  | NS  | NS  | **  | NS  | -   |     |    |    |     |   |
| Pro                        | **  | **  | **  | **  | **  | **  | **  | **  | **  | **  | **  | **  | **  | **  | **  | **  | **  | -  |    |     |   |
| Total AA                   | **  | **  | **  | **  | **  | **  | **  | **  | **  | **  | **  | **  | **  | **  | **  | **  | **  | ** | -  |     |   |
| Total Protein <sup>±</sup> | **  | **  | **  | **  | **  | **  | **  | **  | **  | **  | **  | **  | **  | **  | **  | NS  | **  | ** | -  |     |   |
| Digestibility              | **  | **  | **  | **  | *   | **  | **  | **  | **  | **  | **  | **  | **  | **  | **  | **  | **  | ** | ** | **  | - |

487 \*\* significant at  $P < 0.05$ ; Not significant (NS); <sup>±</sup> Protein values are from [4].

488

489

490

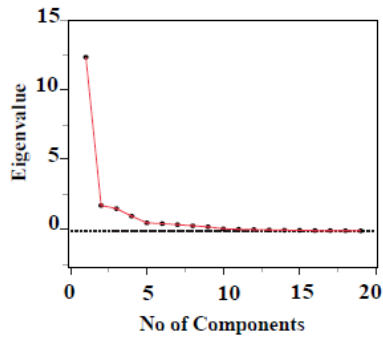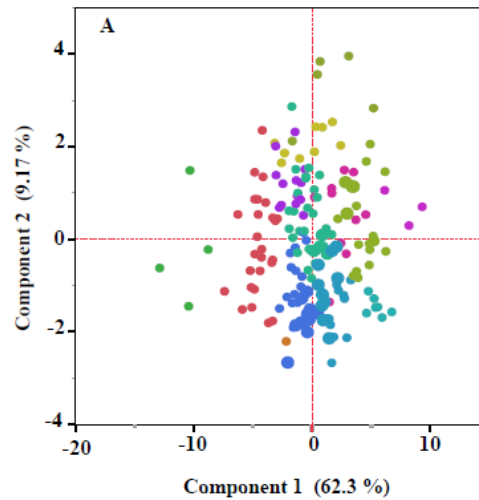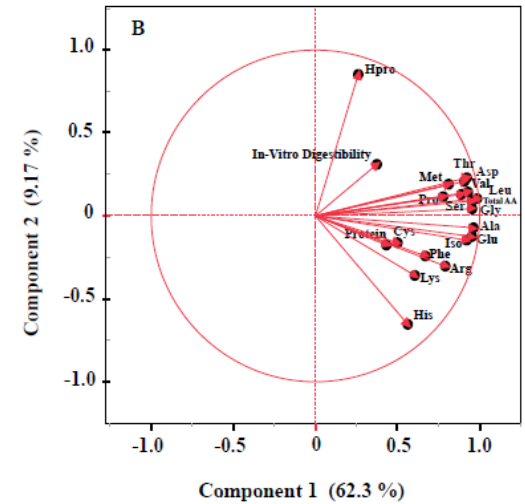

491

492 **Figure 1:** Principal components of individual amino acids (g/100 g), total amino acids (g/100 g), protein (g/100 g), and *in vitro*  
 493 digestibility of organic dry pea: (A) scatter plots and (B) biplots of components 1 and 2. Component 1 includes total AA, valine, alanine,  
 494 glycine, serine, asparagine, isoleucine, threonine, leucine, glutamine, methionine, proline, lysine, and phenylalanine; Component 2  
 495 includes hydroxyproline and histidine; Component 3 includes *in vitro* digestibility; Component 4 includes total protein and arginine;  
 496 Component 5 includes cystine. 

497

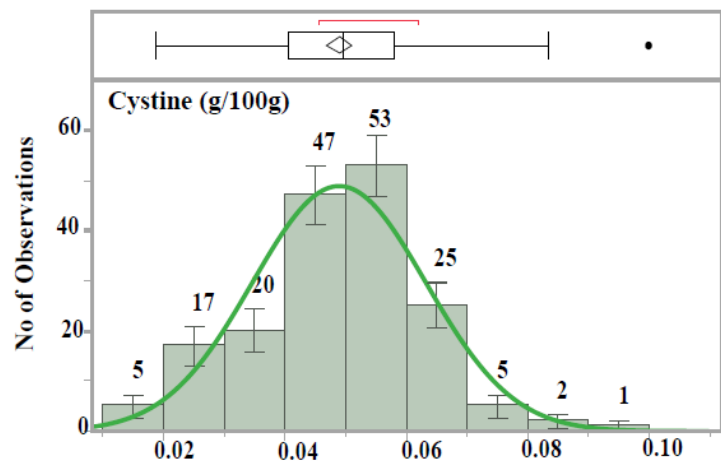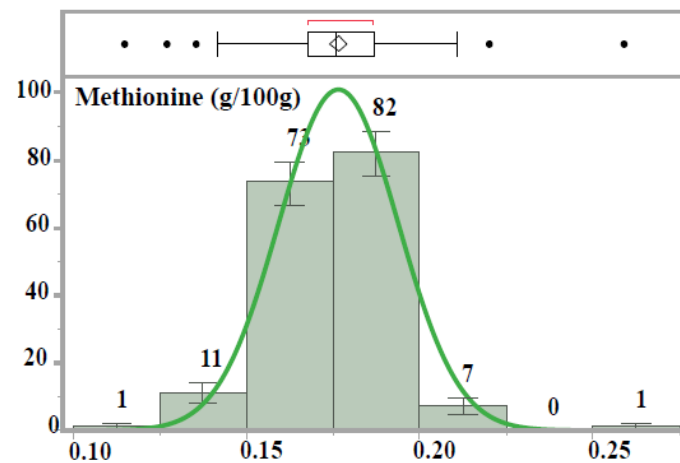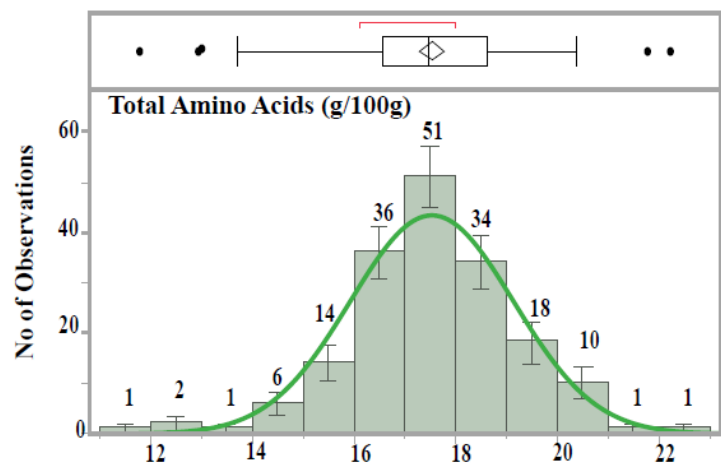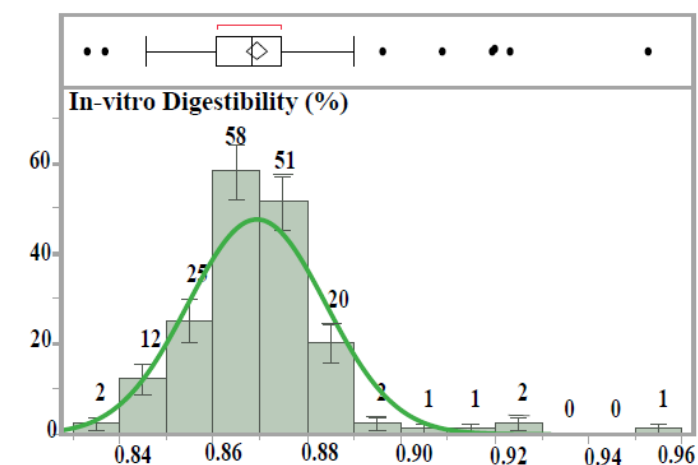

499

500 **Figure 2:** Dry pea cultivar distribution for cystine, methionine, and total amino acid (liberated) concentration as well as *in vitro*  
 501 digestibility.

502

503

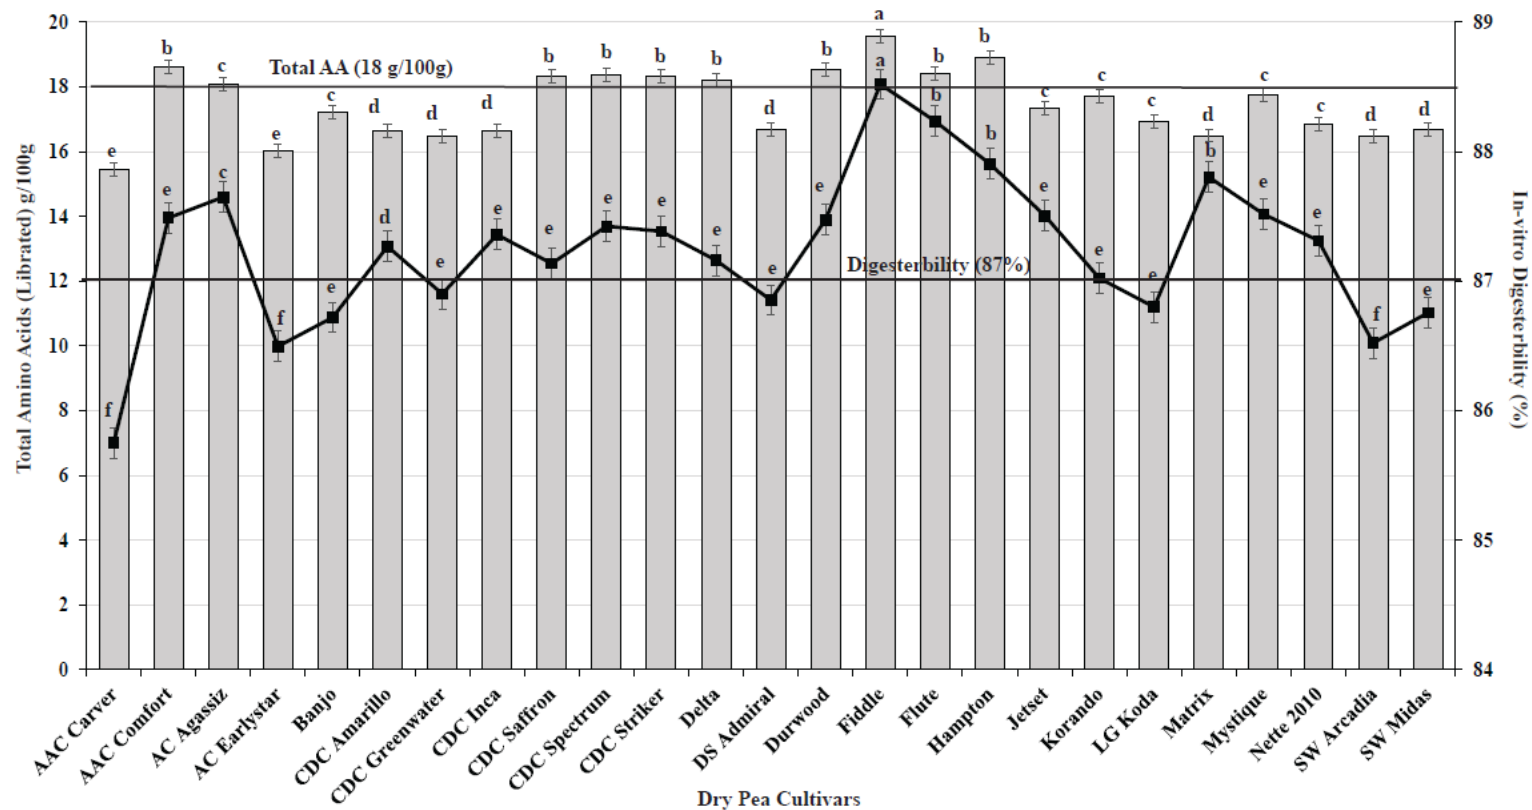

504

505 **Figure 3:** Total amino acids (liberated, g/100 g) and *in vitro* protein digestibility (%) of dry pea cultivars grown in the organic system 

506

507

508

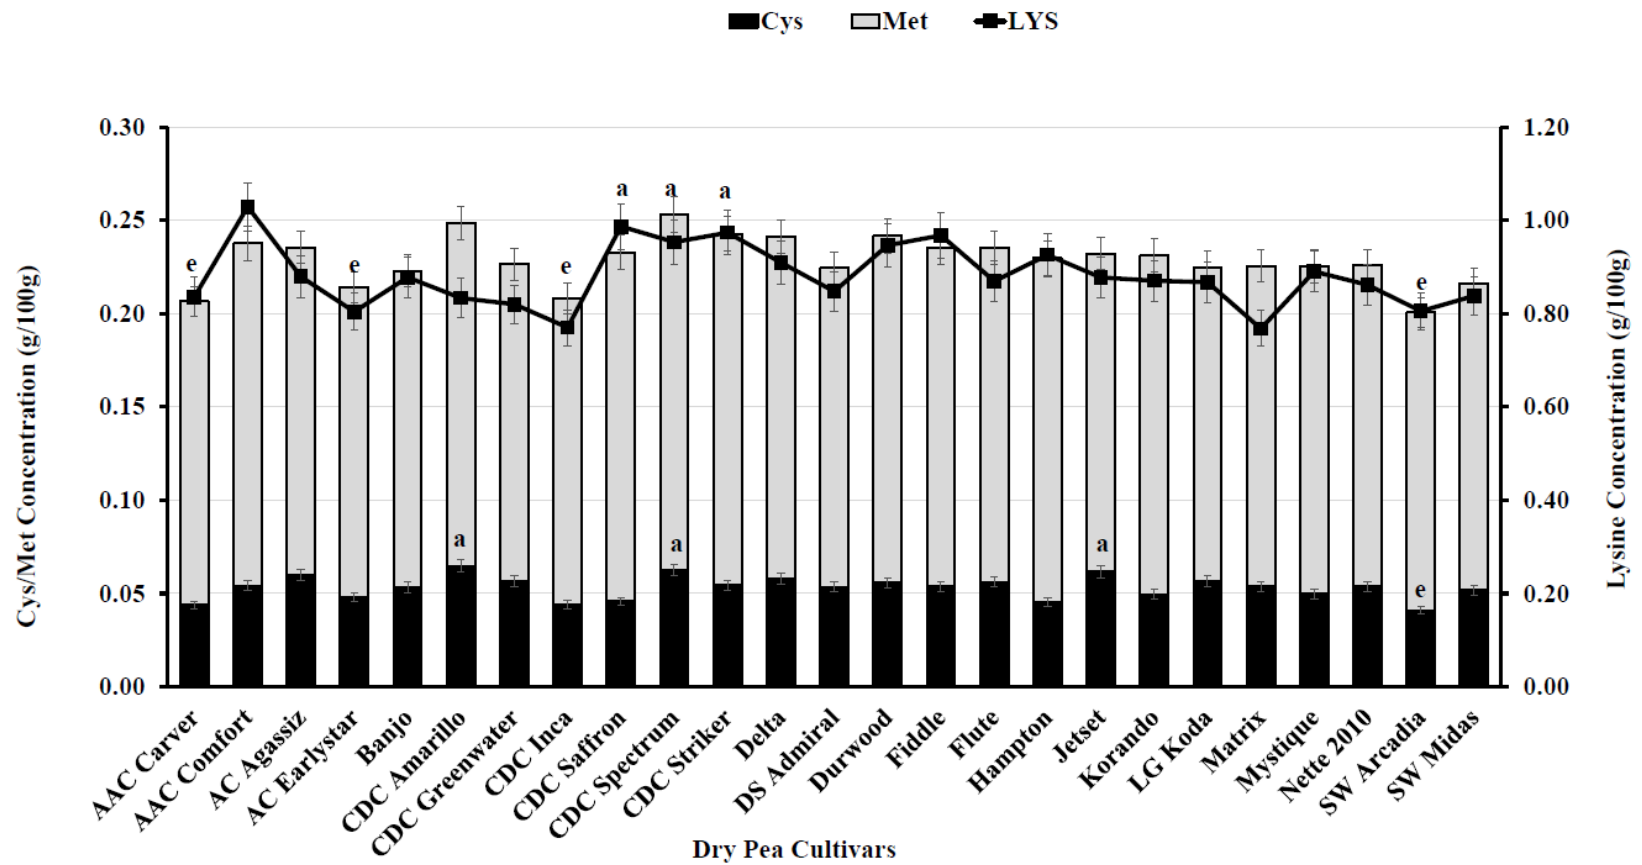

509

510

511

**Figure 4:** Organic dry pea cultivar genetic variation for seed cystine, methionine, and lysine concentrations

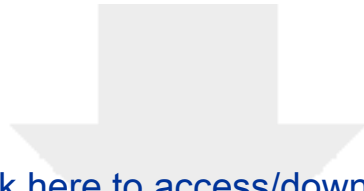

Click here to access/download  
**Supporting Information**  
S1-Supplementary data.xlsx

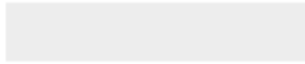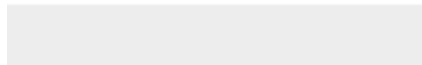

Supplement: pone.0284380.s002.pdf [file pone.0284380.s002.pdf]
